# Supplementary material for: A Novel Class of Schistosoma mansoni Histone Deacetylase 8 (HDAC8) Inhibitors Identified by Structure-Based Virtual Screening and In Vitro Testing
Source: PubMed Central journal article supplement (PMC6017931; doi:10.3390/molecules23030566), 2018-03-02
Supplement: molecules-23-00566-s001.pdf [file molecules-23-00566-s001.pdf]

## Supplementary material

# A novel class of *Schistosoma mansoni* histone deacetylase 8 (HDAC8) inhibitors identified by structure-based virtual screening and in vitro testing

Conrad V. Simoben <sup>1</sup>, Dina Robaa <sup>1</sup>, Alokta Chakrabarti <sup>2,†</sup>, Karin Schmidtkunz <sup>2</sup>, Martin Marek <sup>3,‡</sup>, Julien Lancelot <sup>4</sup>, Srinivasaraghavan Kannan <sup>1,§</sup>, Jelena Melesina <sup>1</sup>, Tajith B. Shaik <sup>3</sup>, Raymond J. Pierce <sup>4</sup>, Christophe Romier <sup>3</sup>, Manfred Jung <sup>2</sup> and Wolfgang Sippl <sup>1,\*</sup>

<sup>1</sup> Department of Pharmaceutical Chemistry, University Halle-Wittenberg, 06120 Halle/Saale, Germany; veranso.conrad@gmail.com (C.V.S.); dina.robaa@pharmazie.uni-halle.de (D.R.); raghavk@bii.a-star.edu.sg (S.K.); jelena.melesina@pharmazie.uni-halle.de (J.M.)

<sup>2</sup> Institute of Pharmaceutical Sciences, University of Freiburg, 79104 Freiburg, Germany; alokta.chakrabarti@gmail.com (A.C.); karin.schmidtkunz@pharmazie.uni-freiburg.de (K.S.); manfred.jung@pharmazie.uni-freiburg.de (M.J.)

<sup>3</sup> Département de Biologie Structurale Intégrative, Institut de Génétique et Biologie Moléculaire et Cellulaire (IGBMC), Université de Strasbourg, CNRS, INSERM, B.P. 10142, 67404 Illkirch Cedex, France; martin.marek@recetox.muni.cz (M.M.); shaik@igbmc.fr (T.B.S.); romier@igbmc.fr (C.R.)

<sup>4</sup> Institut Pasteur de Lille, U1019 - UMR 8204-CIIL-Centre d'Infection et d'Immunité de Lille, CNRS, Inserm, CHU Lille, Université de Lille, F-59000 Lille, France; julien.lancelot@pasteur-lille.fr (J.L.); Raymond.Pierce@pasteur-lille.fr (R.J.P.)

\* Correspondence: wolfgang.sippl@pharmazie.uni-halle.de; Tel.: +49 345 5525040

† Current address: ProQinase GmbH, 79106 Freiburg, Germany

‡ Current address: Loschmidt Laboratories, Department of Experimental Biology & Recetox, Masaryk University, 625 00 Brno, Czech Republic

§ Current address: Bioinformatics Institute (A\*STAR), #07-01 Matrix, 138671 Singapore, Singapore

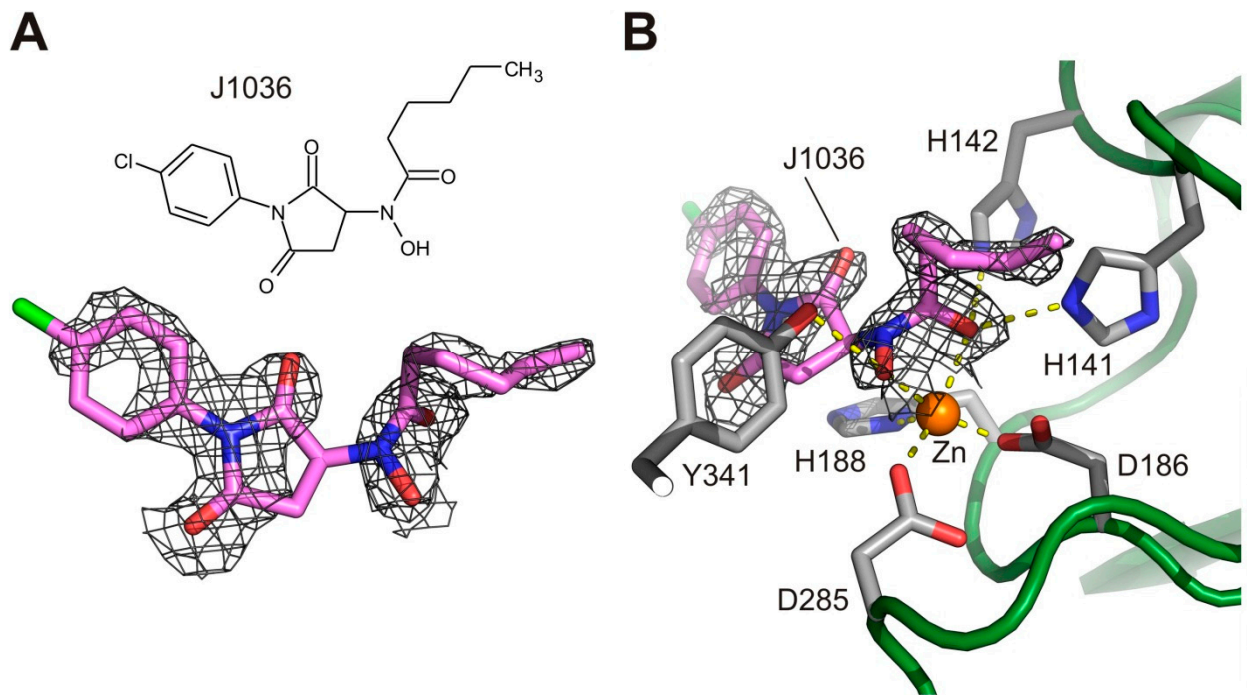

**Figure S1.** X-ray structure of smHDAC8/J1036 complex. A) Observed electron density (contour level  $1\sigma$ ) of the bound J1036 molecule B) smHDAC8/J1036 complex with electron density of bound J1036 (contour level  $1\sigma$ ). The inhibitor molecule is colored magenta, the zinc ion is colored gold.

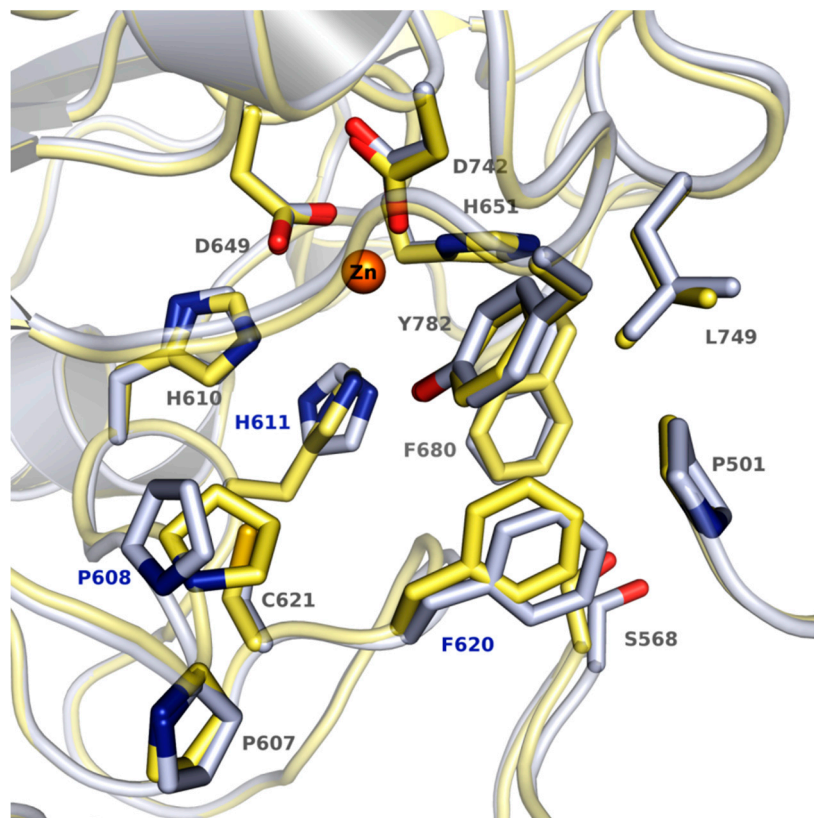

**Figure S2.** Superimposition of the CD2 of hsHDAC6 after minimization with J1036. Backbone of the original protein crystal structure (PDB ID: 5EDU) with closed pocket is shown as a yellow ribbon meanwhile the backbone of the open pocket structure after minimization with J1036 is shown as a white ribbon. Residues in the active site are shown in stick representation and colored respectively.

**Table S1.** Pre-filtered Interbioscreen database (80 compounds) considered for the docking study.

| Comp. ID       | GLIDE SP Score | Classical Hydroxamate<br>-C=O-NH-OH | PAINS | MW     | R/S | SMILES                                             |
|----------------|----------------|-------------------------------------|-------|--------|-----|----------------------------------------------------|
| STOCK1S-00970  | -5.89          | x                                   |       | 297.29 |     | O=C1N(CCCC(=O)N[O-])C(=O)c2c3c1cccc3ccc2           |
| STOCK1S-05147  | -8.73          |                                     |       | 173.24 |     | O=C(N([O-])C(C)C)NC(C)C                            |
| STOCK1S-05630  | -5.42          | x                                   |       | 292.40 |     | Oc1c(cc(cc1C(C)(C)C)CCC(=O)N[O-])C(C)(C)C          |
| STOCK1S-13592  | -6.78          |                                     |       | 199.62 |     | Clc1cc(NC(=O)N([O-])C)ccc1                         |
| STOCK1S-14427  | -6.82          |                                     |       | 286.72 |     | Clc1ccc(NC(ON(CC)C(OCC)=O)=O)cc1                   |
| STOCK1S-44534  | -5.20          | x                                   |       | 150.58 |     | ClCC(C(=O)N[O-])(C)C                               |
| STOCK1S-44885  | -4.84          |                                     |       | 328.35 |     | O(CCNC(=O)Nc1cccc1)C(=O)N([O-])c1ccc(cc1)C         |
| STOCK1S-61698  | -7.24          | x                                   |       | 138.11 |     | O=C(N[O-])c1nccnc1                                 |
| STOCK1S-93629  | -4.33          | x                                   |       | 218.19 |     | O=C(N[O-])c1[n+](O)c(nc2c1cccc2)C                  |
| STOCK2S-07694  | -              | x                                   |       | 235.05 |     | Clc1cc(Cl)ccc1OCC(=O)N[O-]                         |
| STOCK2S-62642  | -4.67          | x                                   |       | 226.66 |     | Clc1c2c(sc1C(=O)N[O-])cccc2                        |
| STOCK2S-83315  | -7.01          |                                     | x     | 243.20 |     | o1cccc1C1=[N+](O)c2c(N([O-])C1=O)cccc2             |
| STOCK2S-84963  | -6.10          | x                                   |       | 235.05 |     | Clc1cc(Cl)ccc1OCC(=O)N[O-]                         |
| STOCK2S-87369  | -5.34          | x                                   |       | 263.10 |     | Clc1cc(Cl)ccc1OCCCC(=O)N[O-]                       |
| STOCK2S-99347  | -              |                                     | x     | 287.68 |     | Clc1ccc(cc1)C1=[N+](O)c2c(N([O-])C1=O)cccc2        |
| STOCK3S-07818  | -5.06          | x                                   |       | 242.68 |     | Clc1cc(C)c(OCCCC(=O)N[O-])cc1                      |
| STOCK3S-93087  | -              |                                     |       | 317.33 |     | O=C1N([O-])C(n2nc(cc2C)-c2cccc2)=Nc2c1cccc2        |
| STOCK3S-95273  | -7.53          |                                     |       | 295.28 |     | Oc1cc(ccc1)\C=N/NC1=Nc2c(cccc2)C(=O)N1[O-]         |
| STOCK4S-02282* | -3.60          |                                     |       | 351.81 | S   | Clc1ccc(N2C(=O)[C@H](N([O-])C(=O)CCCCC)CC2=O)cc1   |
| STOCK4S-02282* | -3.92          |                                     |       | 351.81 | R   | Clc1ccc(N2C(=O)[C@H](N([O-])C(=O)CCCCC)CC2=O)cc1   |
| STOCK4S-03815* | -4.31          |                                     |       | 331.39 | S   | O=C1N(Cc2cccc2)C(=O)C[C@H]1N([O-])C(=O)CCCCC       |
| STOCK4S-03815* | -3.47          |                                     |       | 331.39 | R   | O=C1N(Cc2cccc2)C(=O)C[C@H]1N([O-])C(=O)CCCCC       |
| STOCK4S-11028* | -3.81          |                                     |       | 335.35 | R   | Fc1ccc(N2C(=O)[C@H](N([O-])C(=O)CCCCC)CC2=O)cc1    |
| STOCK4S-11028* | -4.47          |                                     |       | 335.35 | S   | Fc1ccc(N2C(=O)[C@H](N([O-])C(=O)CCCCC)CC2=O)cc1    |
| STOCK4S-11661* | -3.82          |                                     |       | 396.26 | S   | Brc1ccc(N2C(=O)[C@H](N([O-])C(=O)CCCCC)CC2=O)cc1   |
| STOCK4S-11661* | -3.82          |                                     |       | 396.26 | R   | Brc1ccc(N2C(=O)[C@H](N([O-])C(=O)CCCCC)CC2=O)cc1   |
| STOCK4S-25147  | -5.64          |                                     |       | 194.23 | R   | S1CC(=O)N([O-])[C@H]1c1cccc1                       |
| STOCK4S-25147  | -6.95          |                                     |       | 194.23 | S   | S1CC(=O)N([O-])[C@H]1c1cccc1                       |
| STOCK4S-27444* | -3.73          |                                     |       | 317.36 | R   | O=C1N(C(=O)C[C@H]1N([O-])C(=O)CCCCC)c1cccc1        |
| STOCK4S-27444* | -2.94          |                                     |       | 317.36 | S   | O=C1N(C(=O)C[C@H]1N([O-])C(=O)CCCCC)c1cccc1        |
| STOCK4S-31959* | -5.13          |                                     |       | 331.39 | S   | O=C1N(C(=O)C[C@H]1N([O-])C(=O)CCCCC)c1ccc(cc1)C    |
| STOCK4S-31959* | -4.49          |                                     |       | 331.39 | R   | O=C1N(C(=O)C[C@H]1N([O-])C(=O)CCCCC)c1ccc(cc1)C    |
| STOCK4S-48892* | -5.64          |                                     |       | 289.31 | S   | O=C1N(C(=O)C[C@H]1N([O-])C(=O)CCCC)c1cccc1         |
| STOCK4S-48892* | -6.60          |                                     |       | 289.31 | R   | O=C1N(C(=O)C[C@H]1N([O-])C(=O)CCCC)c1cccc1         |
| STOCK4S-53643* | -5.13          |                                     |       | 337.78 | S   | Clc1ccc(N2C(=O)[C@H](N([O-])C(=O)CCCC)CC2=O)cc1    |
| STOCK4S-53643* | -4.47          |                                     |       | 337.78 | R   | Clc1ccc(N2C(=O)[C@H](N([O-])C(=O)CCCC)CC2=O)cc1    |
| STOCK4S-57300  | -5.27          | x                                   |       | 232.22 | R   | O(C)c1ccc(cc1)-c1[nH]nc(c1)C(=O)N[O-]              |
| STOCK4S-57300  | -6.63          | x                                   |       | 232.22 | S   | O(C)c1ccc(cc1)-c1n[nH]c(c1)C(=O)N[O-]              |
| STOCK4S-73929  | -3.08          |                                     |       | 343.75 | R   | Clc1ccc(N2C(=O)[C@H](N([O-])C(=O)c3cccc3)CC2=O)cc1 |
| STOCK4S-73929  | -3.30          |                                     |       | 343.75 | S   | Clc1ccc(N2C(=O)[C@H](N([O-])C(=O)c3cccc3)CC2=O)cc1 |
| STOCK4S-78560* | -3.46          |                                     |       | 303.34 | S   | O=C1N(C(=O)C[C@H]1N([O-])C(=O)CCCC)c1cccc1         |
| STOCK4S-78560* | -5.99          |                                     |       | 303.34 | R   | O=C1N(C(=O)C[C@H]1N([O-])C(=O)CCCC)c1cccc1         |
| STOCK4S-84022  | -              |                                     |       | 255.26 |     | O=C1N([O-])C(n2nc(cc2C)C)=Nc2c1cccc2               |
| STOCK5S-04928  | -6.87          |                                     |       | 193.21 |     | S=C1Nc2c(cccc2)C(=O)N1[O-]                         |
| STOCK5S-12121  | -              |                                     |       | 372.20 |     | Brc1ccc(cc1)/C(=N/NC1=Nc2c(cccc2)C(=O)N1[O-])/C    |
| STOCK5S-21668  | -              |                                     |       | 358.17 |     | Brc1ccc(cc1)\C=N\NC1=Nc2c(cccc2)C(=O)N1[O-]        |
| STOCK5S-30259  | -5.46          |                                     |       | 283.27 |     | o1cccc1/C(=N\NC1=Nc2c(cccc2)C(=O)N1[O-])/C         |
| STOCK5S-30523  | -7.06          |                                     | x     | 295.28 |     | Oc1ccc(cc1)\C=N/NC1=Nc2c(cccc2)C(=O)N1[O-]         |
| STOCK5S-31605  | -6.23          |                                     |       | 339.33 |     | O(C)c1cc(ccc1OC)\C=N/NC1=Nc2c(cccc2)C(=O)N1[O-]    |
| STOCK5S-33544  | -              |                                     | x     | 345.34 |     | Oc1ccc2c(cccc2)c1\C=N\NC1=Nc2c(cccc2)C(=O)N1[O-]   |

|               |       |   |        |   |                                                         |
|---------------|-------|---|--------|---|---------------------------------------------------------|
| STOCK5S-36950 | -     |   | 313.72 |   | Clc1ccc(cc1)\C=N\NC1=Nc2c(cccc2)C(=O)N1[O-]             |
| STOCK5S-38273 | -     |   | 293.31 |   | O=C1N([O-])C(=Nc2c1cccc2)N\N=C(/C)\c1cccc1              |
| STOCK5S-40226 | -2.39 |   | 295.27 | R | O=C(Nc1cc([N+](=O)[O-])ccc1)N([O-])[C@@H](C\C(=N/O)\C)C |
| STOCK5S-40226 | -2.80 |   | 295.27 | S | O=C(Nc1cc([N+](=O)[O-])ccc1)N([O-])[C@H](C\C(=N/O)\C)C  |
| STOCK5S-46144 | -7.64 | x | 323.33 |   | Oc1ccc(cc1)/C(=N\NC1=Nc2c(cccc2)C(=O)N1[O-])/CC         |
| STOCK5S-46331 | -8.10 | x | 309.30 |   | Oc1ccc(cc1)/C(=N\NC1=Nc2c(cccc2)C(=O)N1[O-])/C          |
| STOCK5S-46688 | -4.48 |   | 284.72 |   | Clc1ccc(NC(=O)N([O-])C\C(=N/O)\C)(C)Ccc1                |
| STOCK5S-50748 | -     |   | 293.31 |   | O=C1N([O-])C(=Nc2c1cccc2)N\N=C\c1cccc1C                 |
| STOCK5S-52688 | -     |   | 327.75 |   | Clc1ccc(cc1)/C(=N\NC1=Nc2c(cccc2)C(=O)N1[O-])/C         |
| STOCK5S-54734 | -     |   | 313.72 |   | Clc1cccc1\C=N\NC1=Nc2c(cccc2)C(=O)N1[O-]                |
| STOCK5S-56064 | -     |   | 307.33 |   | O=C1N([O-])C(=Nc2c1cccc2)N\N=C\c1cc(ccc1)C              |
| STOCK5S-58555 | -3.79 | x | 295.28 |   | Oc1cccc1\C=N\NC1=Nc2c(cccc2)C(=O)N1[O-]                 |
| STOCK5S-73318 | -     |   | 285.33 |   | O=C1N([O-])C(=Nc2c1cccc2)N\N=C/1\CCCCC\1                |
| STOCK5S-81005 | -5.18 |   | 280.27 |   | O=C1N([O-])C(=Nc2c1cccc2)N\N=C/c1ccncc1                 |
| STOCK6S-00835 | -5.95 |   | 273.13 | R | BrC1ccc(cc1)[C@H]1SCC(=O)N1[O-]                         |
| STOCK6S-00835 | -6.69 |   | 273.13 | S | BrC1ccc(cc1)[C@@H]1SCC(=O)N1[O-]                        |
| STOCK6S-33232 | -6.95 |   | 330.36 |   | S1C[C@@H](N(C1)C(OC(C)(C)C)=O)C(ON1C(=O)CCC1=O)=O       |
| STOCK6S-33232 | -4.87 |   | 330.36 |   | S1C[C@H](N(C1)C(OC(C)(C)C)=O)C(ON1C(=O)CCC1=O)=O        |
| STOCK6S-38389 | -5.85 |   | 295.29 |   | O=C1N(OC(=O)c2ccc(cc2)-c2cccc2)C(=O)CC1                 |
| STOCK7S-02226 | -5.64 |   | 246.21 |   | O=C1N([O-])C=CC=2n3nc(nc3N=CC1=2)COC                    |
| STOCK7S-02759 | -5.83 |   | 201.16 |   | O=C1N([O-])C=CC=2n3nccc3N=CC1=2                         |
| STOCK7S-16492 | -5.83 | x | 161.53 |   | Clc1[nH]nc(n1)C(=O)N[O-]                                |
| STOCK7S-16492 | -5.19 | x | 161.53 |   | Clc1[nH]c(nn1)C(=O)N[O-]                                |
| STOCK7S-16696 | -6.48 |   | 235.22 |   | O(C)c1cc2c(N=C(N([O-])C2=O)C)cc1OC                      |
| STOCK7S-26244 | -5.70 |   | 202.15 |   | O=C1N([O-])C=CC=2n3nccc3N=NC1=2                         |
| STOCK7S-43289 | -7.59 |   | 142.11 |   | O1N(C(=O)C)C(=O)C=C1N                                   |
| STOCK7S-43543 | -6.50 |   | 204.19 |   | O1N(C(=O)c2cccc2)C(=O)C=C1N                             |
| STOCK7S-45626 | -7.73 |   | 170.17 |   | O1N(C(=O)C(C)C)C(=O)C=C1N                               |
| STOCK7S-47746 | -5.38 |   | 184.19 |   | O1N(C(=O)CC(C)C)C(=O)C=C1N                              |
| STOCK7S-49196 | -4.56 |   | 256.62 |   | Clc1cc(ccc1F)C(=O)N1OC(N)=CC1=O                         |
| STOCK7S-49604 | -7.96 |   | 220.02 |   | BrC=1C(=O)N(OC=1C)C(=O)C                                |
| STOCK7S-50104 | -5.85 |   | 258.16 |   | Fc1c(F)c(F)ccc1C(=O)N1OC(N)=CC1=O                       |
| STOCK7S-50249 | -4.71 |   | 172.14 |   | O1N(C(OCC)=O)C(=O)C=C1N                                 |
| STOCK7S-51469 | -6.07 |   | 210.23 |   | O1N(C(=O)C2CCCC2)C(=O)C=C1N                             |
| STOCK7S-52645 | -7.04 |   | 282.09 |   | BrC=1C(=O)N(OC=1C)C(=O)c1cccc1                          |
| STOCK7S-53377 | -7.17 |   | 274.06 |   | Clc1nc(Cl)ccc1C(=O)N1OC(N)=CC1=O                        |
| STOCK7S-53722 | -6.24 |   | 283.63 |   | Clc1ccc([N+](=O)[O-])cc1C(=O)N1OC(N)=CC1=O              |
| STOCK7S-54511 | -7.05 |   | 240.16 |   | Fc1ccc(F)c1C(=O)N1OC(N)=CC1=O                           |
| STOCK7S-54658 | -7.14 |   | 240.16 |   | Fc1ccc(F)cc1C(=O)N1OC(N)=CC1=O                          |
| STOCK7S-54794 | -7.62 |   | 288.18 |   | FC(F)(F)Oc1ccc(cc1)C(=O)N1OC(N)=CC1=O                   |
| STOCK7S-55112 | -6.18 |   | 273.07 |   | Clc1cc(cc(Cl)c1)C(=O)N1OC(N)=CC1=O                      |
| STOCK7S-55612 | -6.84 |   | 239.62 |   | Clc1ncc(cc1)C(=O)N1OC(N)=CC1=O                          |
| STOCK7S-56364 | -6.61 |   | 284.07 |   | BrC1ccc(cnc1)C(=O)N1OC(N)=CC1=O                         |
| STOCK7S-59574 | -     |   | 312.37 |   | O=C1N(OC)C(n2nc(cc2CC(C)C)C)=Nc2c1cccc2                 |
| STOCK7S-64837 | -     |   | 297.34 |   | O=C1N([O-])C(n2nc(cc2CC(C)C)C)=Nc2c1cccc2               |
| STOCK7S-69412 | -     |   | 316.13 |   | BrC1cccc1C1=Nc2c(cccc2)C(=O)N1[O-]                      |

\*Compounds that were selected for biological testing (highlighted in green); - = Compounds for which no docking pose was generated since they failed to correctly coordinate to the zinc ion; MW = Molecular weight; For chiral compounds both R/S stereoisomers were considered.

**Table S2.** smHDAC8/inhibitor X-ray structure. Data collection and refinement statistics.

| <b>Data collection</b>                                   | <b>smHDAC8-J1036</b>       |
|----------------------------------------------------------|----------------------------|
| Space group                                              | P1                         |
| <b>Cell dimensions</b>                                   |                            |
| a, b, c (Å)                                              | 70.71 70.69 99.19          |
| $\alpha$ , $\beta$ , $\gamma$ (°)                        | 75.33 77.78 84.8           |
| Resolution (Å)*                                          | 41.21 - 1.55 (1.59 - 1.55) |
| Rmerge (%)                                               | 6.3 (74.7)                 |
| I / $\sigma$ I                                           | 11.87 (1.94)               |
| Completeness (%)                                         | 95.6 (87.8)                |
| Redundancy                                               | 3.5 (2.9)                  |
| CC(1/2)                                                  | 99.4 (60)                  |
| <b>Refinement</b>                                        |                            |
| Resolution (Å)                                           | 41.96-1.55                 |
| No. reflections                                          | 253034                     |
| Rwork / Rfree (%)                                        | 19.94/22.27                |
| <b>No. atoms</b>                                         |                            |
| Protein                                                  | 1628                       |
| Ligand/ion                                               | 90                         |
| Water                                                    | 599                        |
| <b>B-factors</b>                                         |                            |
| Protein                                                  | 29.01                      |
| Ligand/ion                                               | 43.84                      |
| Water                                                    | 34.93                      |
| <b>R.m.s deviations</b>                                  |                            |
| Bond lengths (Å)                                         | 0.007                      |
| Bond angles (°)                                          | 0.86                       |
| *Values in parentheses are for highest-resolution shell. |                            |
